# Supplementary material
Source: PubMed Central journal article supplement (PMC5489363)

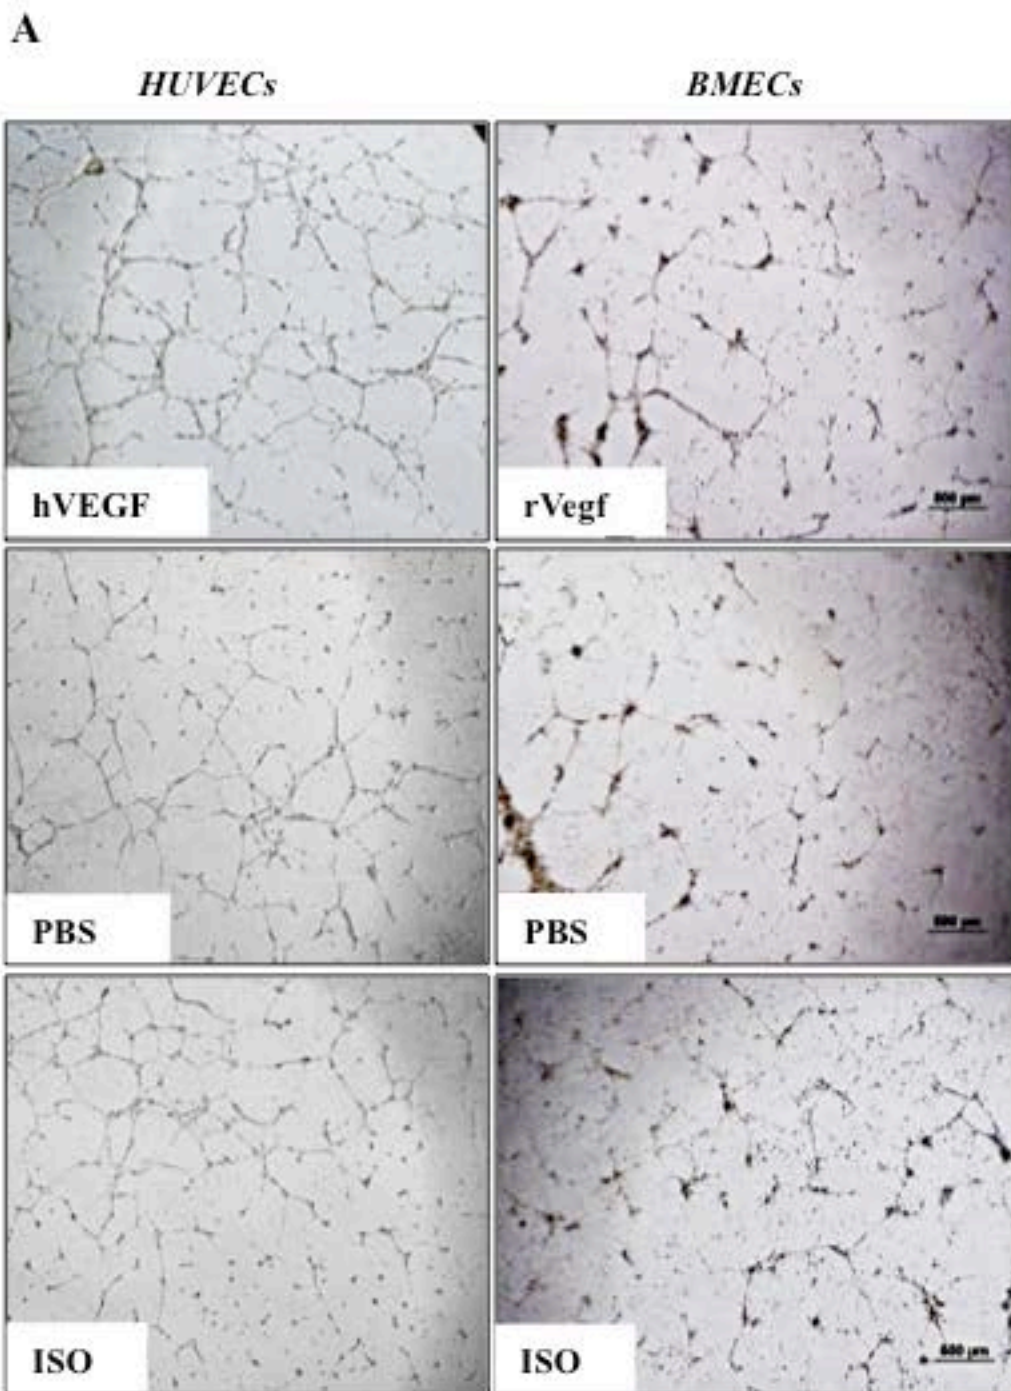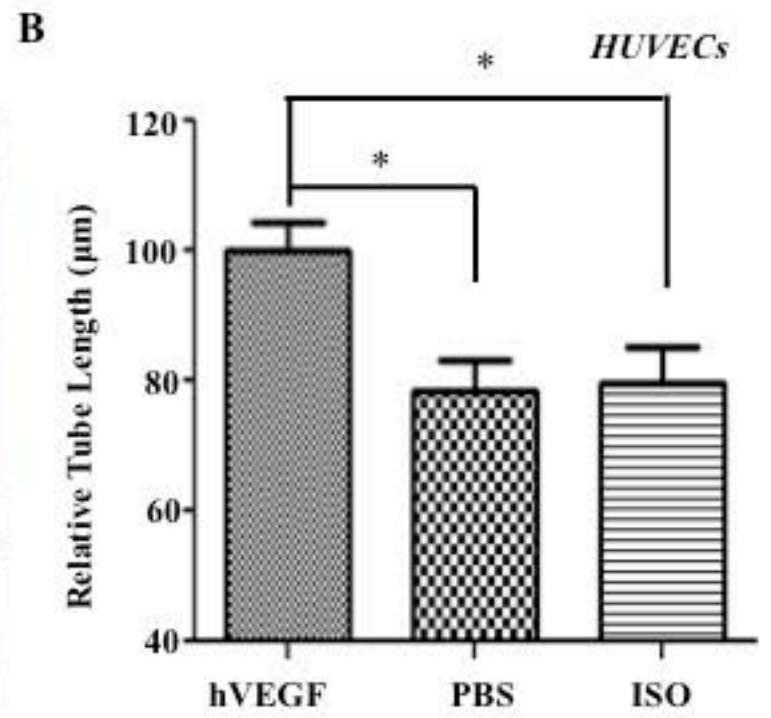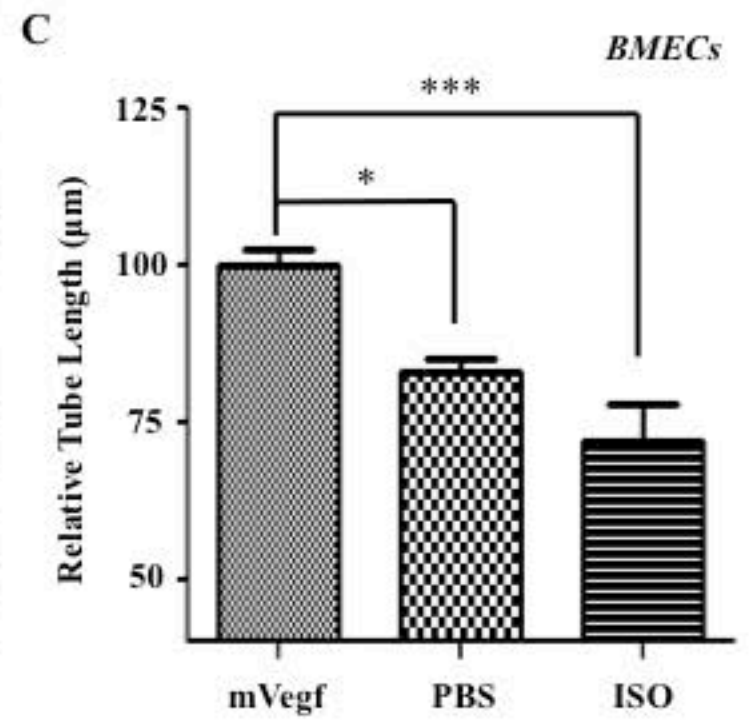

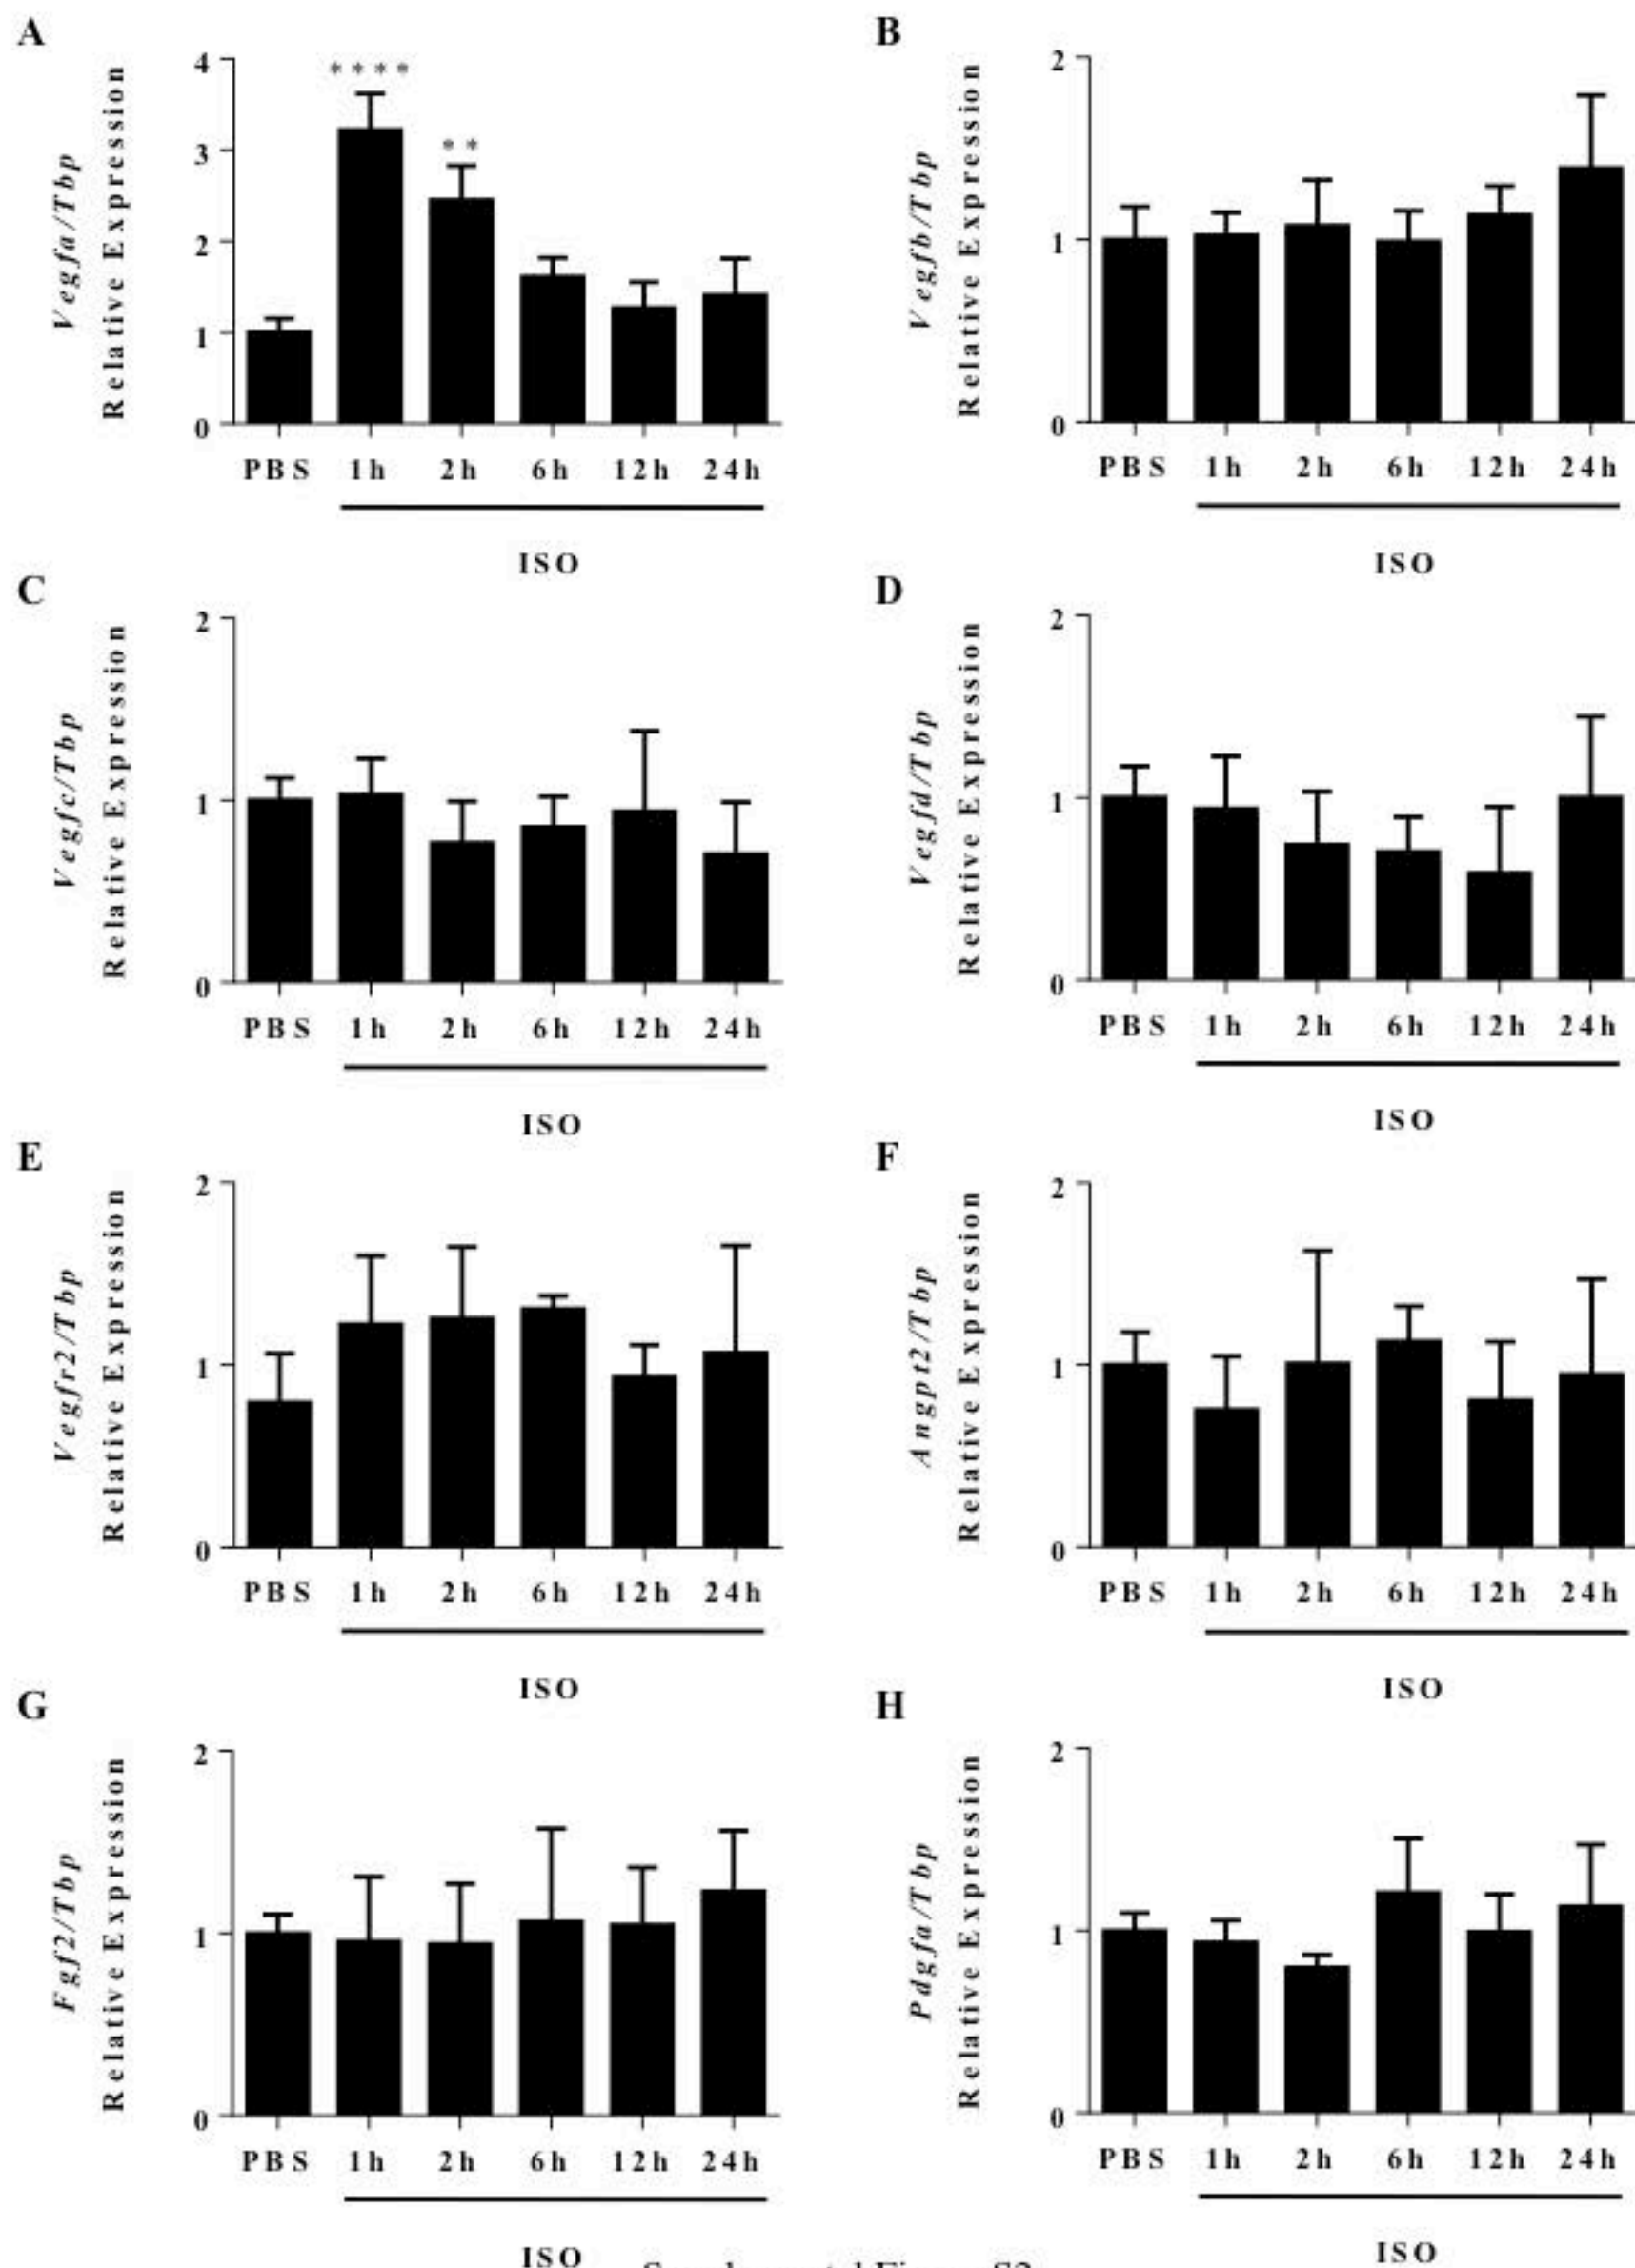

ISO

Supplemental Figure S2

ISO

**A**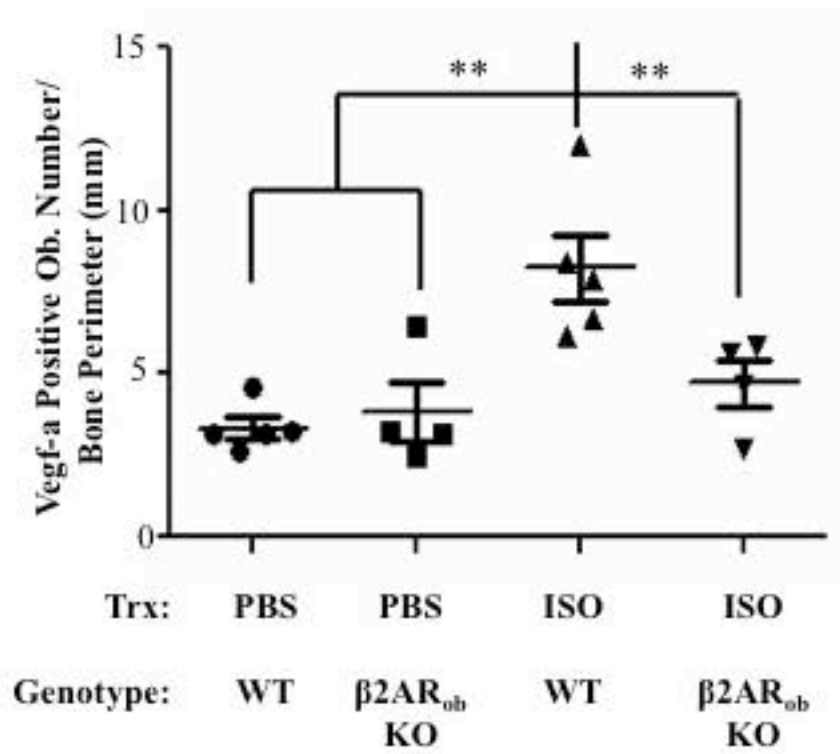**B**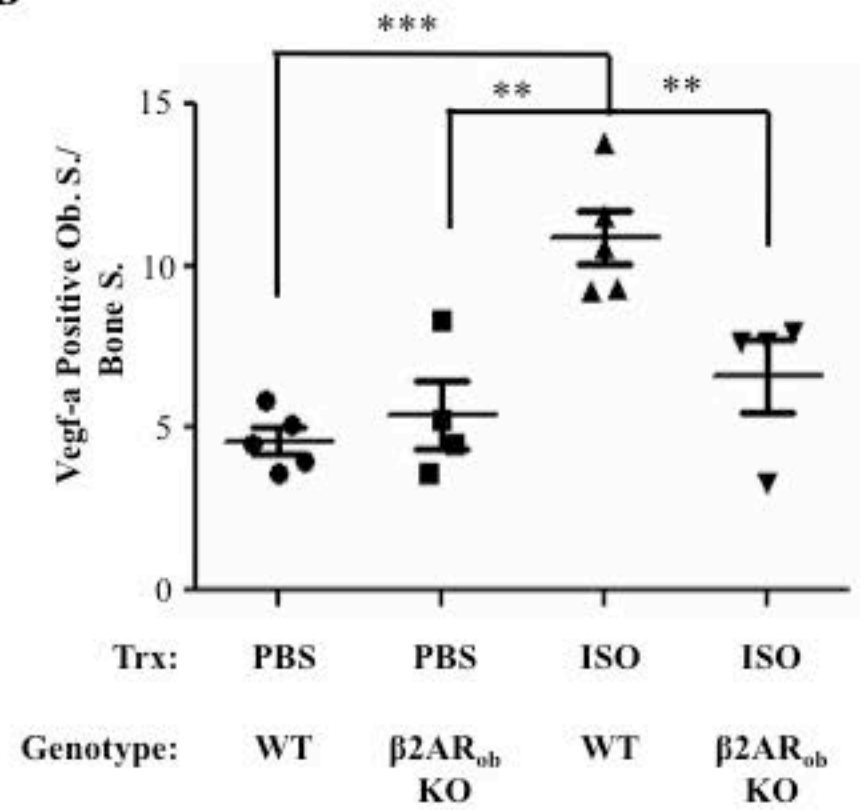

**A**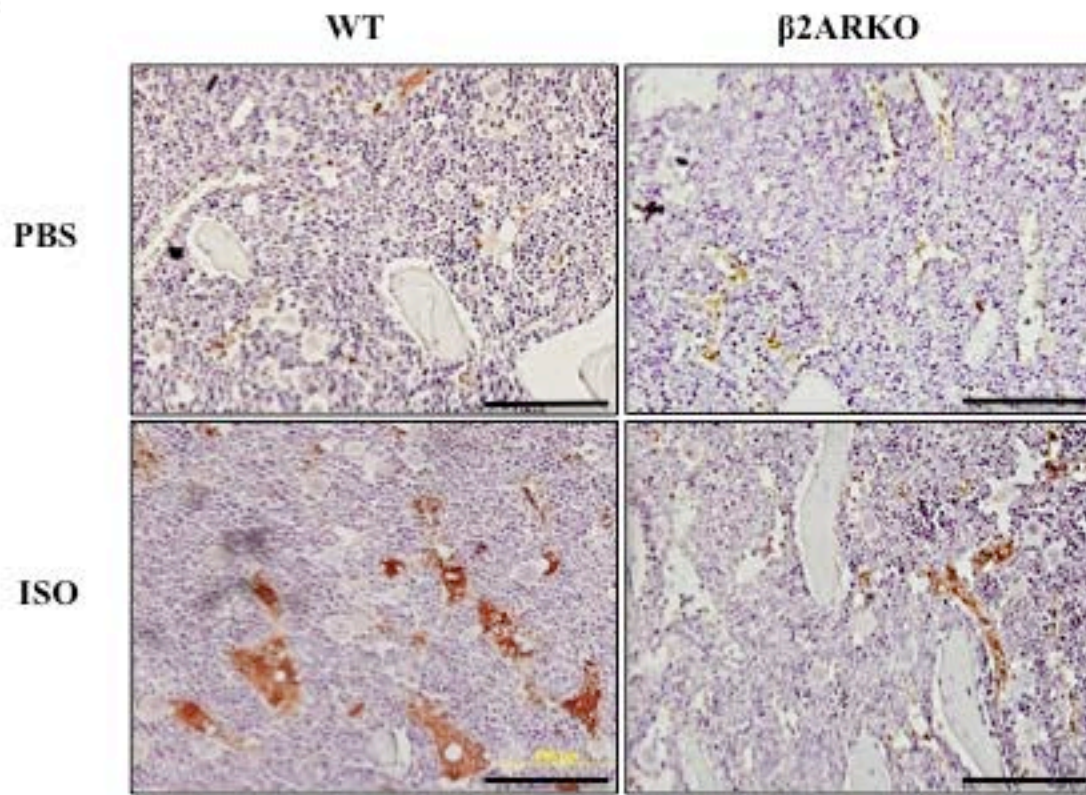**B**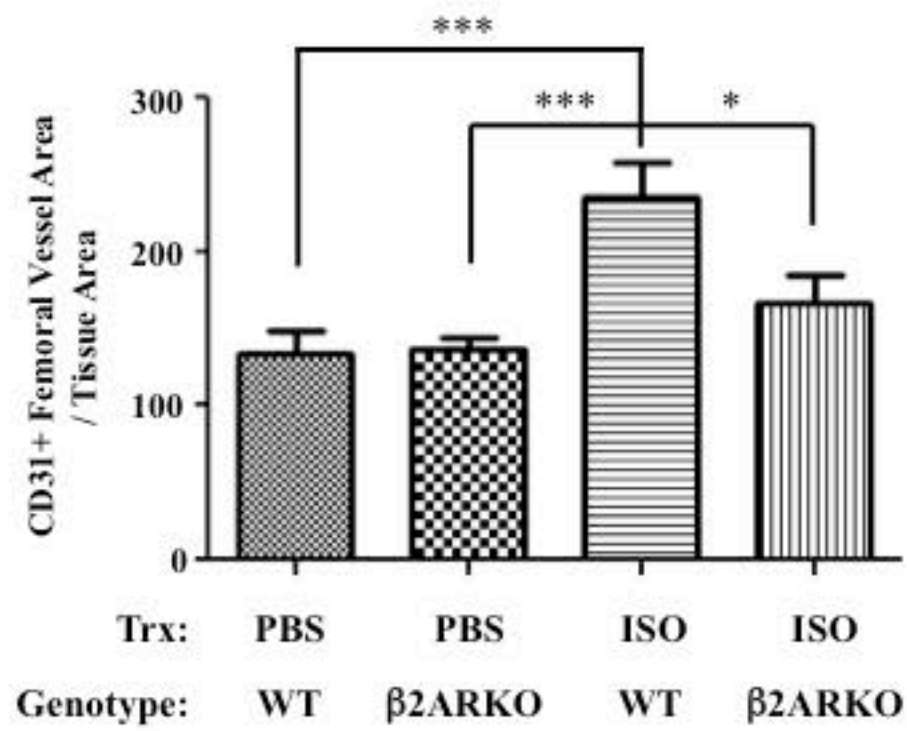



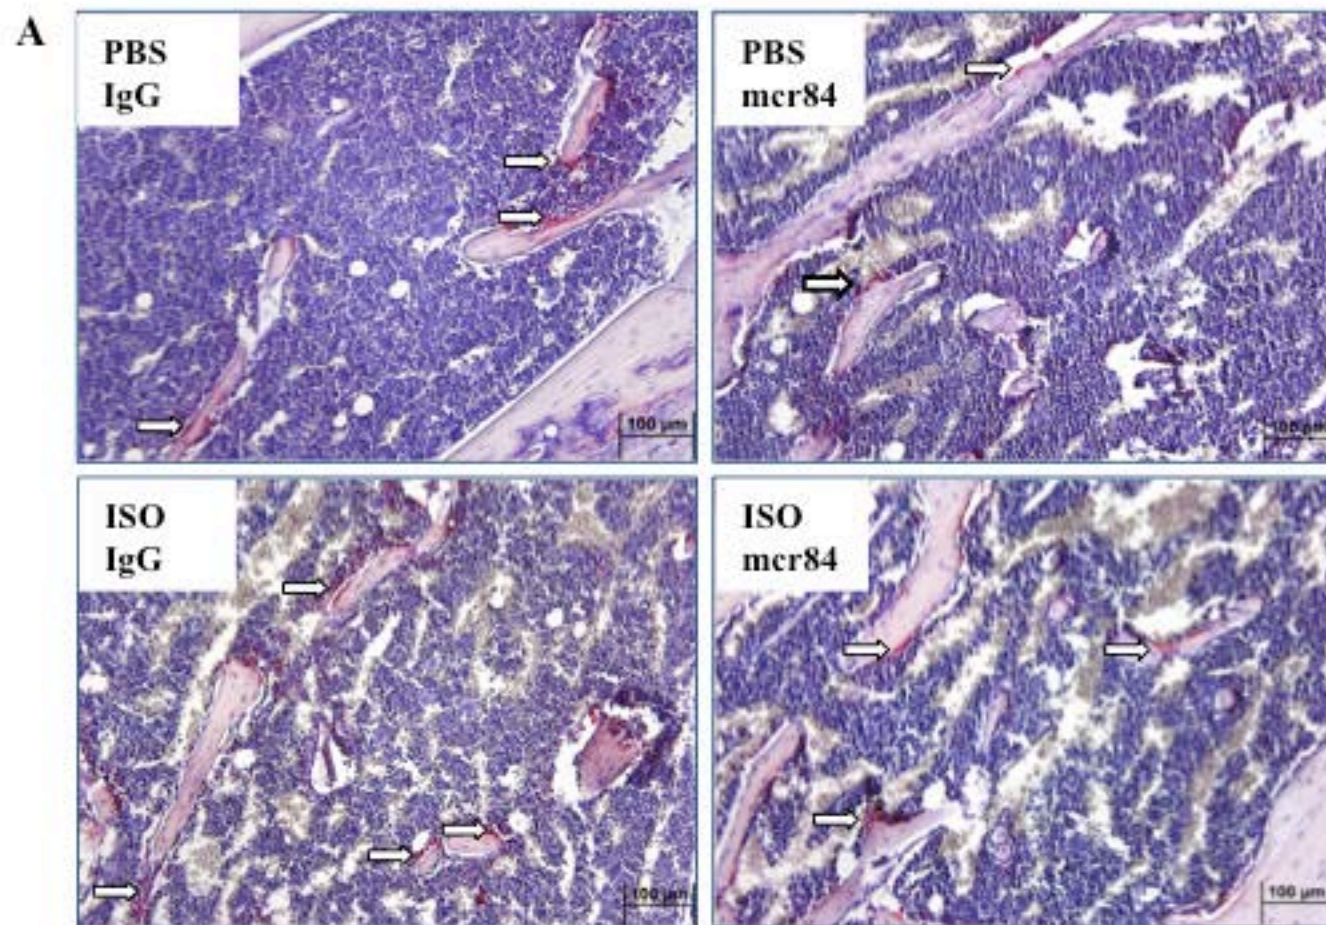

**B**

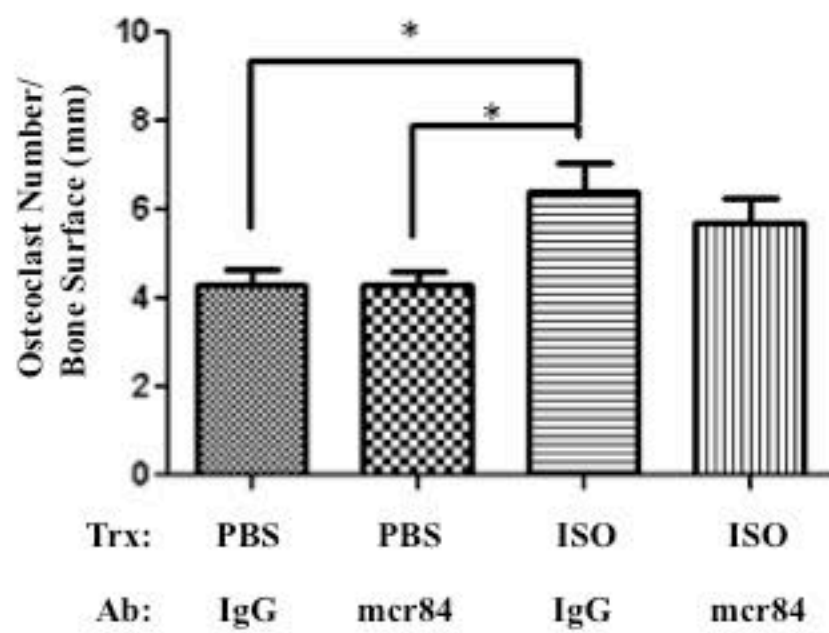

**A**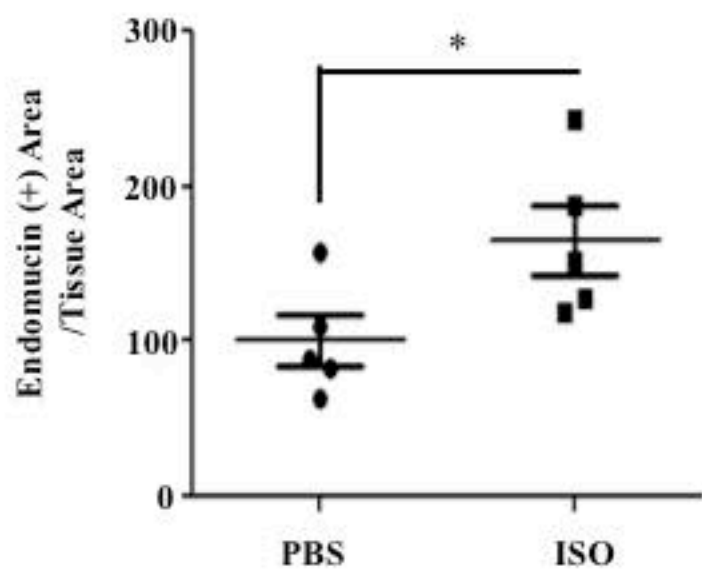**B**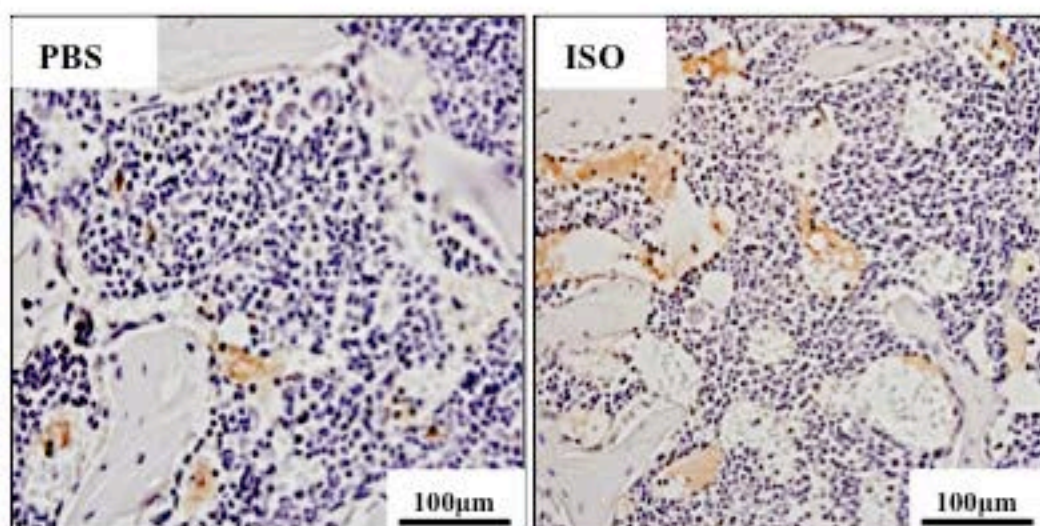

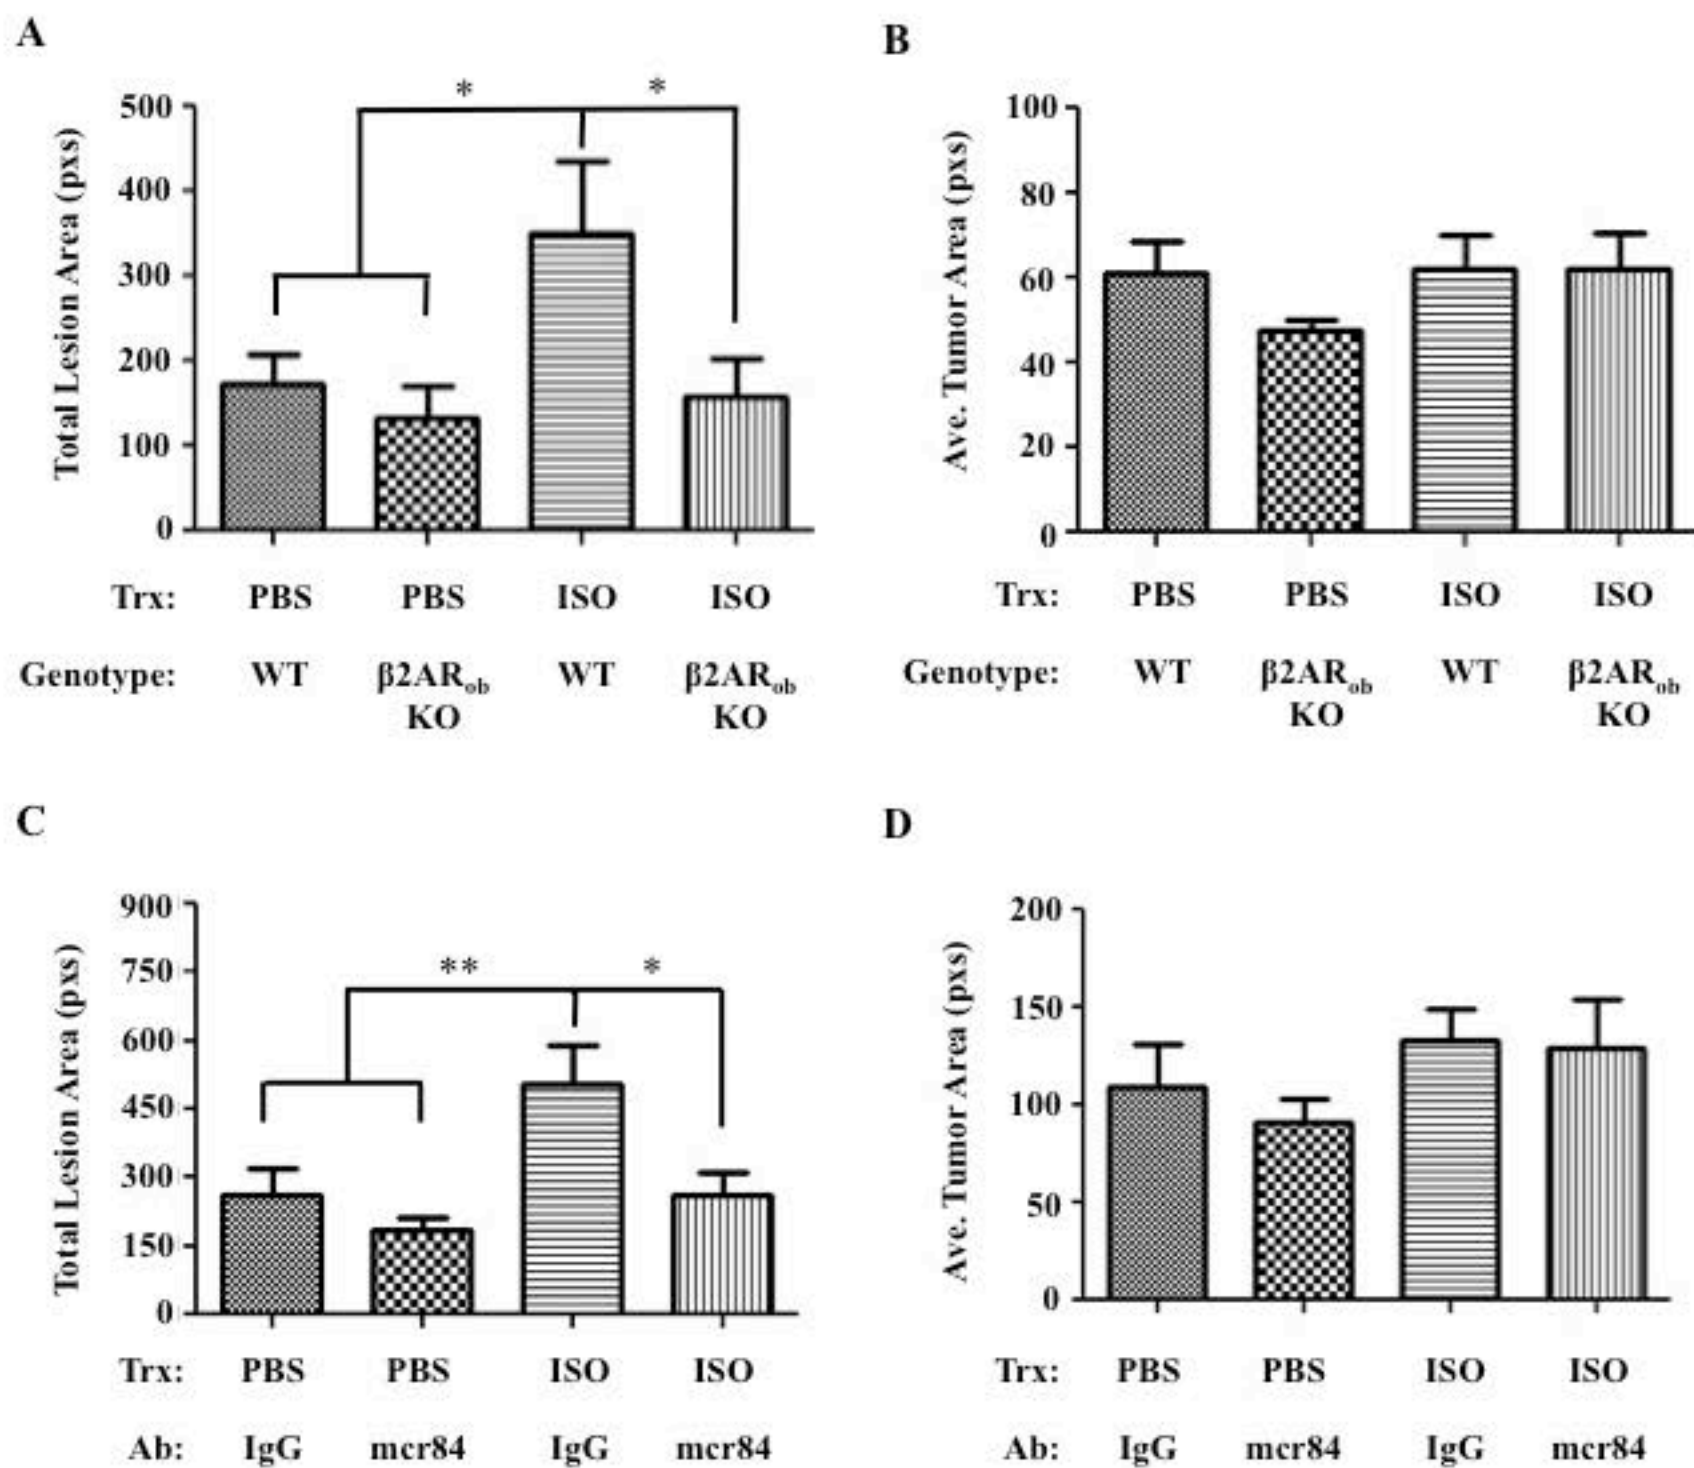

Supplement: NIHMS860677-supplement-Supp_figures.pdf [file NIHMS860677-supplement-Supp_figures.pdf]
